# Supplementary material for: Acute otitis externa: Consensus definition, diagnostic criteria and core outcome set development
Source: PLoS One. 2021 May 14;16(5):e0251395. doi: 10.1371/journal.pone.0251395 (PMC8121300; doi:10.1371/journal.pone.0251395)
Supplement: S1 Data — (XLSX) [file pone.0251395.s006.xlsx]

## Sheet: Pro_Round 1
ID	Please select you stakeholder group	Otitis externa should be considered as 'chronic' after...	Comments	Aural fullness	Unable to score/comments	External auditory canal erythema	Unable to score/comments	External auditory canal granulations	Unable to score/comments	External auditory canal oedema	Unable to score/comments	Generalised lethargy	Unable to score/comments	Hearing impairment	Unable to score/comments	Itchiness	Unable to score/comments	Jaw pain	Unable to score/comments	Microbiological identification of an organism	Unable to score/comments	Odour related to the ear	Unable to score/comments	Otalgia (ear pain)	Unable to score/comments	Otorrhoea (discharge from the ear)	Unable to score/comments	Tragal tenderness	Unable to score/comments	Please state any other symptoms or signs that you think should be included in diagnostic criteria for otitis externa	...on improvement in the ability to concentrate	Unable to score/comments	...on results of bacterial or fungal growth on an ear swab	Unable to score/comments	...if patients completed the course of treatment	Unable to score/comments	...if patients were compliant with the treatment	Unable to score/comments	...if patients died during treatment	Unable to score/comments	...on improvements in discharge from the ear (otorrhoea)	Unable to score/comments	...on improvements in reactive over-healing in the ear canal (called granulations)	Unable to score/comments	...on improvements in ear canal redness (erythema)	Unable to score/comments	...on improvements in ear canal swelling (oedema)	Unable to score/comments	...on improvements in ear pain (otalgia)
1	Audiologist	6 weeks		5		8		8		8		6		5		7		5			This is not something I would do	5		5		7		5					8		9		9				9		9		8		8		7
2	Audiologist	12 weeks		5		7		6		6		3		9		8		3		5		9		9		9		5			7		6		9		9		9		9		7		9		9		9
3	Audiologist	12 weeks		4		8		8		7		5		6		5		4		8		8		8		9		6			6		8		7		7		3		7		7		8		8		8
4	Audiologist	4 weeks	Most acute cases should have been resolved with treatment by 2 to 3 weeks and if it persists after 3 weeks, then classify it as chronic.	3		8		4		8		3		2		8		5		3		5		8		5		7			2		6		8		8		2		8		8		8		8		8
5	Audiologist	12 weeks		2		5		4		7		3		6		6		5		8		8		7		8		9			6		8		9		9		8		8		8		8		8		7
6	Audiologist	6 weeks		5		5		3		3		3		6		8		4		3		7		7		8		6			4		7		7		7		2		9		6		7		6		7
7	Audiologist	12 weeks		5						7				6		6		6		8		7		9		8		7				unable to score	7		7		7			unable to score	7			unable to score	6		6		8
8	Audiologist	12 weeks		1		9		5		7		1		3		8		1		9		7		8		8		3		conductive hearing loss	1		9		9		9		1		9		7		9		9		9
9	Audiologist	6 weeks		6		8		9		9		6		5		9		2		7		5		6		7		7			6		9		9		8		8		7		9		9		9		9
10	Audiologist	6 weeks	Not responding to treatments in this time	5		8		9		8		8		5		8		5		9		9		9		9		7			5		9		8		8		5		7		8		9		9		9
11	ENT consultant - General / Non-otology	6 weeks		1		9		3		9		1		3		3		1		1		1		9		7		8			1		2		1		1		2		8		3		9		9		9
12	ENT consultant - General / Non-otology	12 weeks		1		8		4		8		1		3		5		4		9		7		9		8		8			1		9		7		7		1		8		8		8		8		9
13	ENT consultant - General / Non-otology	4 weeks		5		5		5		8		3		8		7		7		7		6		9		7		7		pain around the ear -top/back/below and front	5		8		8		8		3		8		6		8		9		9
14	ENT consultant - General / Non-otology	4 weeks		5	Interpreted as aural blockage sensation	9		3	Marker of more severe bacterial cases	8		1		2		8	Not universally present	3	Marker of more severe OE	4	Often not isolated.	2		7		5		6	Marker of more severe OE		2		5		8		8		2		7		7		8		8		8
15	ENT consultant - General / Non-otology	6 weeks		4		8		9		8		1		4		9		6		5	I see it as a skin disorder primarily	5		7		7		7		Other dermatitis or equivalent	2		2		5		5		1		4	Many don’t have much anyway	7		7		7		8
16	ENT consultant - General / Non-otology	12 weeks		5		7		6		7		2		3		7		6		2		3		9		9		4			2		5		7		7		1	Died incidentally?	8		7		7		7		8
17	ENT consultant - General / Non-otology	4 weeks	If one considers a fungal acute OE can last up to 3 weeks then a reasonable conversion is as stated assuming the correct antibacterial given.	1		4		4		8		1		9		7		1		8		3		8		7		5		Type of discharge _wax, blood,	1		7		1		1		1		9		9		8		9		9
18	ENT consultant - General / Non-otology	4 weeks		3		7		4		7		5		5		7		5		3		4		6		6		6			4		5		5		6		2		7		6		8		8		7
19	ENT consultant - General / Non-otology	12 weeks	Previous definitions talk about 3 month timeframe.	6		9		7		8		3		6		5		7		7		7		9		9		7			4		8		6		6		2		8		8		7		7		7
20	ENT consultant - General / Non-otology	6 weeks	Anything shorter then 6 weeks maybe due to fungal otitis externa.	7		7		9		7		2		7		7		4		7		5		8		9		7				Didn’t quite understand the question	5		9		9		1		9		9		5		5		9
21	ENT consultant - General / Non-otology	12 weeks		3		9		1		3		1		1		3		2		7		7		6		7		7			4		9		9		9		9		9		9		9		9		9
22	ENT consultant - General / Non-otology	6 weeks		6		9		8		9		4		8		8		7		9		8		8		8		9		Excoriation of skin around the concha	5		9		6		8		8		8		8		8		8		8
23	ENT consultant - General / Non-otology	8 weeks		3		9		7		8		5		1		7		5		4		5		9		7		3			4		8		8		8		9		9		5		9		9		9
24	ENT consultant - General / Non-otology	6 weeks		3		8		9		7		4		6		5		2		6		6		7		8		5			5		5		9		9		9		9		9		9		7		8
25	ENT consultant - General / Non-otology	3 weeks		3		3		5		6		1		6		8		2		7		6		8		7		4		non mucoid discharge	4		8		8		8		6		9		6		4		7		9
26	ENT consultant - Otologist	6 weeks		1		9		7		8		1		4		4		4		3		5		9		9		8			1		7		8		8		6		7		7		8		8		8
27	ENT consultant - Otologist	6 weeks		2		8		6		8		3		6		7		6		7		7		9		9		8			3		8		7		7		2		9		7		7		7		9
28	ENT consultant - Otologist	6 weeks		1		5		1		9		1		1		5		1		9		9		5		9		1			1		9		9		9		9		9		1		5		9		9
29	ENT consultant - Otologist	4 weeks		3		7		8		9		5		6		9		6		7		6		8		9		7			2		4		7		7		3		9		8		7		9		9
30	ENT consultant - Otologist	6 weeks	Similar to rhinological criteria	4		6		8		9		3		4		3		5		3		2		4		9		6		Nil	3		3		7		9		7		9		8		6		9		5
31	ENT consultant - Otologist	6 weeks		4		9		3		7		3		5		3		4		5		1		8		8		6			4		7		7		7		3		9		6		9		9		9
32	ENT consultant - Otologist	12 weeks		1		7		5		6		1		4		5		2		3		6		9		8		3		Presence of keratin/mucous debris in the EAC (as opposed to granulations which suggest inflammatory tissue related to the EAC skin)	4		4		9		9		9		9		9		9		9		9
33	ENT consultant - Otologist	8 weeks				8		5		5		2		6		7		7		5		1		9		4		7			5		4		7		7		2		6		7		7		8		8
34	ENT consultant - Otologist	6 weeks	This is consistent with some definitions of Chronic suppurative otitis media	1		4		2		7		1		2		6		1		5		7		5		4		2			1		3		7		7		2		7		3		3		3		8
35	ENT consultant - Otologist	12 weeks	to fit in with many other conditions and is easy to remember.	2		9		2		8		1		5		7		4		2		5		6		7		5			1		6		6		6		5		9		7		8		9		9
36	ENT consultant - Otologist	6 weeks		3		9		7		9		1		7		8		7		4		4		9		7		8			1		4		9		9		1		9		9		9		9		9
37	ENT consultant - Otologist	12 weeks		7		9		4		8		2		7		6		4		4		6		8		7		8			1		7		7		7		2	This would be a rare event and most likely unrelated to the OE, unless the diagnosis was incorrect in the first place.	9		8		9		9		9
38	ENT consultant - Otologist	6 weeks		5		7		8		8		5		7		6		4		6		8		9		9		8			2		5		7		7		8		9		9		8		8		9
39	ENT consultant - Otologist	12 weeks		4		9		1	granulation is usually a sign of more significant infection such as NOE/SBO	8		5		9		9		4	jaw movement may exacerbate pain but difficulty moving the jaw (trismus) is indicative of NOE especially if there is granulation	1	In the acute setting thorough toileting and empiric treatment with good aural hygene more important	4	severe odour may indicate middle ear pathology driving the process	9		9		9			9		1	usually contaminated and may not be a true reflection of pathogenic organisms	8	education on how to use drops imperative	9		1	we are talking AOE not SBO/NOE please do not confuse the two	9		1	granulation not common with AOE please make sure you are not confusing with MOE	9		9		9
40	ENT consultant - Otologist	12 weeks		1		9		1		9		1		1		9		5		1		1		7		7		5			1		5		7		7		5		9		9		9		9		9
41	ENT consultant - Otologist	12 weeks		2		9		3		5		1		5		3		8		3		3		9		6		9		If Ear canal is patent, There should be no hearing loss (todifferentiate from Otitis media which will have Otalgia and erythema of TM)	4		4		9		9		3		9		9		9		9		9
42	ENT consultant - Otologist	4 weeks		5		9		1		9		1		7		7		5		7		7		9		5		9			3		5		8		8		1		8		5		9		9		9
43	ENT consultant - Otologist	12 weeks		5		9		3		7		2		5		7		3		3	Microbiology is not necessary for diagnosis but is to guide appropriate treatment	2		7		3		3			2		9		9		9		5		6		7		9		9		9
44	ENT consultant - Otologist	6 weeks		6		7		4		8		2		3		8		3		6		5		8		7		6			1		6		8		8		3		8		6		8		8		9
45	ENT consultant - Otologist	8 weeks	In my opinion, anything longer than 8 weeks should be reviewed closely to exclude malignancy or necrotising Otitis externa.	3		7		7		8		1		6		4		6		7	Otitis Externa can also be secondary to psoriasis and eczema and hence microbiological identification in my opinion doesnt have highest score but a reasonably high score	7		9	Otalgia in presence of other symptoms has very high significance	7		9			1		8		8		7		1		9		9		9		9		9
46	ENT consultant - Otologist	6 weeks		5		8		7		8		3		4		8		7		2		6		9		4		7			4		3		8		8		6		4		8		8		9		9
47	ENT consultant - Otologist																														3		8		8		9		8		8		5		5		6		8
48	ENT registrar	12 weeks		4		8		5		8		1		4		7		7		6		8		8		6		7		The presence of moist squamous debris in the ear canal	2		7		7		7		1		8		6		9		9		9
49	ENT registrar	4 weeks		6		7		7		7		5		6		5		6		7		6		7		7		5			3		6		6		7		4		7		6		5		7		7
50	ENT registrar	12 weeks	If the initial acute infection has not been treated adequately - the time period over which the symptoms occur could be several weeks but I would still consider this an 'acute' infection. If symptoms persist despite adequate treatment - this could be called a chronic infection.	5		5		7		9		2		7		9		5		7		8		9		8		6			5		7		8		8		8		8		8		6		9		9
51	ENT registrar	12 weeks		4		9		7		7		3		4		4		1		5		5		9		8		7			3		6		7		7		8		7		7		8		8		9
52	ENT registrar	12 weeks	fungal can be bit more resistant, therefore I think a longer period is warranted for chronic	5		4	this is very non specific especially when seen by GPs	7	key factor when combined with risk of Nec OE	9	very important	1		6		8		3		7		8		9		9		8					8		8		9		7	if in combination with a diagnosis of Nec OE, when this is more likely (ie what features did those with Nec OE have on presentation )	9		8		7		9		9
53	ENT registrar	4 weeks		3		4		6		8		2		5		4		4		6		8		8		8		8			1		2		4		5		2		7		7		7		8		8
54	ENT registrar	6 weeks	Less than this often represents under-treatment rather than chronicity of infection	6		8		7		9		2		4		8		5		9		5		9		7	Depends on type of discharge - i.e. including in the diagnostic criteria may cause overlap with perforated AOM	7	May not be present if simple		4	Very subjective and difficult to prove is related to AOE only	8		7		9	Especially important with antibiotic resistances	3	Unlikely to die if simple AOE	9		9		9		9		9
55	ENT registrar	6 weeks		2		9		5		9		1		5		9		5		3		5		5		5		5		It might also be worth including exudate or debris within the canal as a sign, as depending on the nature of this it may be almost diagnostic in and of itself. I tend to divide the features mentioned above into those that are normally present (itch, erythema, oedema and debris), those that are quite often present (otorrhoea, otalgia, tragal tenderness, odour, hearing impairment, aural fullness) a…	2		2		8		8		8		9		8		9		9		9
56	ENT registrar	12 weeks		3		6		7		9		1		6		9		8		5		8		7		7		7			1		9		9		9		9		9		7		8		9		9
57	ENT registrar	6 weeks		2		7		7		8		1		3		7		2		7		8		9		9		8		White/yellow debris/discharge or fungal spores visualised on otoscopy/microscopy	1		9		8		8		8	Patients rarely die during treatment of acute otitis externa alone, but I think it would be an important outcome in patients with complications e.g. malignant otitis externa	9		5		5		9		9
58	ENT registrar	6 weeks		1		4		4		9		2		4		6		2		2		1		9		9		9			1		5		9		9		9		9		9		7		9		9
59	ENT registrar	4 weeks	I would class this definition as "how long after appropriate treatment has been commenced" as we often see OE that has been going on for some time but has not been treated correctly	2		8		1		9		3		6		7		6		8		8		9		8		6			5		8	I think a prospective study should include swabs but I do not routinely swab on first visit unless not responding to treatment	8	more important in fungal infections than bacterial	9		9		9		9		7		7		9
60	ENT registrar	3 weeks		6		9		8		8		3		7		6		6		6		6		9		9		9			7		7		9		9		4		9		8		9		9		9
61	ENT registrar	6 weeks		5		7		8		8		3		8		7		8		2		7		8		8		8			5		5		7		8		5		8		8		8		8		8
62	ENT registrar	12 weeks	To mimic rhinosinusitis criteria	5		6		8		8		4		4		7		5		7		8		7		7		6			4		6		5		6		6		7		7		5		5		5
63	ENT registrar	12 weeks	> 3 months duration	5		6		7		7		4		6		6		4		8		6		8		6		6			4		8		8		8		7		8		7		7		7		7
64	ENT registrar	4 weeks		7		9		9		9		5		6		5		5		5		6		9		9		8			5		6		8		8		1		9		9		9		9		9
65	ENT registrar	6 weeks		1		5		1		9		1		7		9		5		1		6		7		8		9			5		3		7		7		5		9		5		4		9		9
66	ENT registrar	8 weeks	Taking into account time it takes for a minimum duration of 'best treatment' - i.e. swab targeted topical antimicrobial with microsuction and ear hygiene - most likely after a referral to secondary care following empirical primary care prescribing. Should there be a 'without complications' category as well. I would treat these patients differently e.g. pain out of proportion in high risk patients…	3		5		7		8		2		8		8		4		9		8		9		9		7			2		7		8		8		9		9		8		4	This is difficult to characterise unless imaging has been taken or same person sees the patient?	9		9
67	ENT registrar	6 weeks		4		6		7		8		1		4		6		6		6		8		9		9		6			5		4		8		8		9		9		7		6		8		9
68	ENT registrar	12 weeks	12 weeks	3		9		5		8		3		7		5		3		6		4		9		7		7		Disequilibrium	2		7		9		9		9		9		9		9		9		9
69	ENT registrar	6 weeks		6		8		9		9		5		5		5		7		8		7		7		8		6			3		7		9		9		9		7		7		7		7		7
70	ENT registrar	6 weeks		1		3		5	Certainly diagnostic but not essential	5	Certainly diagnostic but not essential	1		1		3		3		5	Certainly diagnostic but not essential	3		8		8		6		Debris/keratin as important as discharge/otorrhoea	3		8		8		8		8		8		8		3		7		8
71	ENT registrar	6 weeks		5		9		9		9		1		5		9		5		5		9		9		9		5			1		1		7		7		1		9		8		9		9		9
72	ENT registrar	6 weeks	Expectation of response to topical and oral antibiotics by 6 weeks in acute episode	3		8		8		8		3		7		7		6		6		6		8		8		7			1	This isn’t a clear question!	7		7		7		7		8		8		8		9		9
73	ENT registrar	4 weeks		1		6		6		8		1		1		7		1		3		3		9		9		5			1		5		5		7		9		9		6		7		8		9
74	ENT registrar	6 weeks		2		3		5		5		2		6		8		6		4		7		7		8		6			2		8		8		8		5		6		8		5		8		8
75	GP	12 weeks		5		6		2		7		1		6		6		4		3		3		9		9		7			1		3		7		7		9		9		5		9		9		9
76	GP	4 weeks		3		8		7		7		2		5		7		4		7		6		8		8		8			2		2		3		3		7		7		7		7		6		9
77	GP	8 weeks		3		5		5		6		3		6		8		6		3		7		7		8		8		?discharge present before pain -8	3		4		8		8		8		8		7		6		8		8
78	GP	6 weeks		3		3		3		3		1		7		5		1		9		7		7		9		5			3		7		7		9		1		7		3		5		5		7
79	GP	4 weeks		5		8		8		8		5		6		3		8		8		8		8		8		8			8		8		8		8		8		8		8		8		8		8
80	GP	12 weeks		8		8		9		8		6		6		7		6		9		8		9		9		7			5		9		9		8		5		8		9		7		8		9
81	GP	4 weeks		7		8		8		8		6		3		7		3		8		8		7		7		4			3		8		7		8		1		7		4		8		8		8
82	GP	4 weeks		4		7		7		9		9		7		9		9		7		7		9		9		9			5		7		7		5		5		7		7		7		5		9
83	GP	6 weeks		4		7			I am unsure of the significance of this	7		1		5		7		1		6		7		7		8		4			3		5		6		6		6		7		4		7		7		9
84	GP	4 weeks		7		6		7		8		4		4		7		7		8		6		8		9		9			8		7		7		7		4		9		6		7		9		9
85	GP	4 weeks		3		5		4		5		2		3		1		2		5		2		6		9		6			2		7		4		6		1		8		6		7		7		7
86	GP	4 weeks		8		8		5		5		3		4		8		5		6		8		7		8		7			6		6		7		7		7		7		6		6		6		7
87	GP	4 weeks		3		9		7		7		3		6		5		3		2		6		9		7		7		Unilateral/ bilateral symptoms, fever	2		2		7		7		7		8		3	I have never seen this.	7		8		8
88	GP	6 weeks		7		9		8		9		1		5		8		5		7		6		7		6		7			5		7		9		9		7		9		9		9		9		9
89	Junior doctor (below ST3)	6 weeks		3		8		8		6		4		6		7		5		6		6		9		9		6			2		6		6		7		4		7		5		8		8		9
90	Junior doctor (below ST3)	4 weeks		4		6		6		9		3		9		9		7		6		8		9		9		8			5		9		9		9		9		9		8		9		9		9
91	Junior doctor (below ST3)	6 weeks		4		5		7		8		4		8		6		3		6		6		7		8		8			5		3		5		5		6		7		8		8		8		8
92	Junior doctor (below ST3)	4 weeks		2		9		5		9		1		3		7		3		5		3		9		7		6			2		5		7		7		9		8		7		7		8		9
93	Junior doctor (below ST3)	6 weeks		6		3		7		7		3		9		6		6		9		6		7		7		4			6		9		9		9		9		9		6		6		6		9
94	Junior doctor (below ST3)	6 weeks		4		9		8		6		4		3		3		3		9		7		8		8		7			4		9		8		8		8		9		9		8		7		7
95	Junior doctor (below ST3)	4 weeks		7		7		5		8		4		6		6		4		6		5		9		8		8			4		6		8		9		4		8		6		8		9		9
96	Junior doctor (below ST3)	6 weeks		3		9		7		7		4		6		8		8		7		7		7		8		7			6		5		8		9		7		7		8		9		9		9
97	Junior doctor (below ST3)	3 weeks		5		8		8		9		7		6		8		6		6		8		8		9		7			5		9		9		9		9		9		7		9		9		9
98	Junior doctor (below ST3)	6 weeks		7		7		4		7		4		7		8		5		8		5		8		6		8			4		7		7		7		7		3		4		7		7		9
99	Junior doctor (below ST3)	3 weeks		7		7		5		8		2		6		7		6		8		7		9		9		9		nausea, dizziness.	6		7		8		9		2		8		8		9		9		9
100	Junior doctor (below ST3)	2 weeks		6		6		4		4		3		8		8		5		5		7		9		9		8			6		7		8		8		6		9		7		7		8		9
101	Junior doctor (below ST3)	3 weeks		3		8		7		9		4		4		5		4		7		7		7		8		7		History of previous otitis external	4		4		9		9		8		8		8		8		8		8
102	Microbiologist	4 weeks		7		7		3		6		1		5		7		4		1		3		7		7		5			5		9		9		9		9		9		5		9		9		9
103	Microbiologist	4 weeks		8		8		5		6		1		4		5		4		1		1		8		6		8			4		8		9		9		8		9		7		8		8		9
104	Microbiologist	4 weeks	4 weeks after no specific treatment-if still no better, then chronic	5	Not a specific criterion	6		7		6		2		6		6			Unable to score this	6		7		9		8		9			5		4		5		6		5		8		8		8		8		9
105	Microbiologist	4 weeks				7		1		8		6		6		7		8		7		6		8		7		8					7		9		8		7		8		7		7		7
106	Microbiologist	12 weeks		3		4		6		6		3		7		7		5		7		8		5		8		6			8		8	What happens in the absence of a positive swab at first presentation?	9			Either in response to this outcome or the two above (results of bacterial or fungal growth, and completing course of treatment), the development of antimicrobial resistance is an important outcome for efficacy of any antimicrobial chemotherapy management and also in preventing future reoccurrence.	9		8		7		7		7		7
107	Nurse	10 weeks		5		6		6		6		1		4		5		3		5		3		8		9		7			1		6		6		7		5		9		7		9		9		9
108	Nurse	12 weeks	signs and symptoms lasts for more than 3months	8		9		3		9		5		8		8		7		3		5		8		9		7			6		5		8		7		9		9		8		9		9		9
109	Nurse	10 weeks		1		4		6		8		5		5		4		4		9		9		9		9		9		wet , purulent keratin, fungal spores, thrush white spots	7		9		9		9		9		8		7		7		8		8
110	Nurse	6 weeks		6		8		7		7		4		5		7		8		7		7		8		7		8			5		8		7		7		9		7		7		8		9		9
[truncated: 66 more columns]

## Sheet: Pro_Round 2
ID	Please select you stakeholder group	From the onset of symptoms, treated or untreated acute otitis externa should be considered to have become ‘chronic’ after…	Comments	Aural fullness	Unable to score/comments	External auditory canal erythema	Unable to score/comments	External auditory canal granulations	Unable to score/comments	Generalised lethargy	Unable to score/comments	Hearing impairment	Unable to score/comments	Itchiness	Unable to score/comments	Jaw pain	Unable to score/comments	Microbiological identification of an organism	Unable to score/comments	Odour related to the ear	Unable to score/comments	Tragal tenderness	Unable to score/comments	Squamous debris/keratin	Unable to score/comments	...on improvement in the ability to concentrate	Unable to score/comments	...on results of bacterial or fungal growth on an ear swab	Unable to score/comments	...if patients died during treatment	Unable to score/comments	...on the ease of applying the treatment	Unable to score/comments	...on any impact on activities of daily living or performing household task	Unable to score/comments	...on any impact on ability to care for the family (for adults)	Unable to score/comments	...on any impact on mental health	Unable to score/comments	...on any impact on sleep	Unable to score/comments	...on any impact on the ability to socialise	Unable to score/comments	...on any impact on the ability to work	Unable to score/comments	...on improvements in a feeling of fullness in the ear (aural fullness)	Unable to score/comments	...on improvements in a feeling of generalised weakness	Unable to score/comments
1	ENT consultant - General / Non-otology	6 weeks		1		9		1		1		2		6		1		1		2		8		1		1		1		1		1		2		2		1		7		2		7		1		1
2	ENT consultant - Otologist	6 weeks		1		9		1		1		1		4		1		4		1		1		1		1		9		1		1		1		1		1		1		1		1		1		1
3	ENT registrar	4 weeks	Unless correct treatment has not been instigated	6		8		6	I would say granulation would indicate chronic not acute	1		3	I think this is covered by aural fullnesss and discharge	8		5		7		7		7		3		1		6	I would score this more strongly if all patients were swabbed routinely	4		5		5		3		3		8		4		8		7		1
4	ENT registrar	12 weeks		3		8		5		2		4		7		4		5		6		5		6		2		5		8		3		6		4		3		7		6		6		4		3
5	ENT consultant - Otologist	6 weeks		1		9		6		1		6		6		5		6		7		8		2	I don't personally feel this to be relevant for straightforward AOE. Many conditions produce this and most cases of AOE do not.	1		7		8	Only because a death is always relevant, especially if someone died during the treatment of AOE of all things. But to ROUTINELY report on this? No.	7		6		6		7		7		7		8		6	Interesting one. I don't feel strongly about having aural fullness in the actual definition but I suppose a treatment's effect on it would be interesting to know.	4
6	GP	6 weeks		8		9		2		2		2		7		2		8		8		8		8		5		9		9		9		8		8		8		8		8		8		8		7
7	ENT consultant - Otologist	6 weeks		2		7		5		2		7		8		5		6		3		9		4		1		5		5		7		7		1		7		7		1		7		1		1
8	Junior doctor (below ST3)	6 weeks		2		9		8		1		2		8		2		8		8		8		2		1		1		8		8		8		2		8		8		1		2		3		1
9	Junior doctor (below ST3)	6 weeks		2		9		7		1		5		6		2		6		6		6		7		1		7		3		7		4		3		3		8		7		8		5		5
10	ENT consultant - Otologist	12 weeks	Synchronous with COM and CRS	1		9		3	Only present when OE is severe/NOE	1		3	Most early OE has normal hearing	7		3		1		1		3		7		1		3	Swabs usually not taken	3		5		1		1		1		3		1		1		5		1
11	Audiologist	4 weeks		3		9		7		1		5		7		4		7		7		7		7		1		8		1		8		5		5		5		8		4		8		7		5
12	ENT consultant - General / Non-otology	8 weeks		3		8		9		3		7		9		6		4		7		8		5		6		5		9		6		5		5		5		7		6		6		5		5
13	ENT consultant - Otologist	12 weeks		3		9		7		1		6		5		4		7		6		6		5		1		7		1		7		6		5		5		7		5		7		6		5
14	ENT registrar	12 weeks		4		7		7		1		6		7		5		6		6		7		5		1		7		7		7		6		3		7		7		3		7		5		2
15	ENT consultant - General / Non-otology	4 weeks		5		8		6		3		6		7		7		4		4		8		5		5		5		5		7		5		6		4		3		4		5		7		3
16	ENT consultant - Otologist	6 weeks		5		9		7		1		5		7		5		6		8		7		8		1		8		9		7		6		5		5		6		5		8		7		3
17	GP	6 weeks		8		7		6		3		5		7		6		6		6		6		7		6		6		6		6		6		5		4		4		4		4		4		5
18	ENT registrar	12 weeks		5		8		5		1		6		7		3		7		6		7		7		1		7		2		7		5		5		6		7		6		7		6		4
19	ENT registrar	6 weeks		5		8		5		8		6		9		4		4		5		9		5		1		2		2		9		6		4		3		8		5		8		7		1
20	ENT consultant - General / Non-otology	4 weeks		1	It depends on ones meaning of fullness. Does the patient mean blocked or pressure as part of Menieres? Plus not a term well defined. I have gone for the later but would be on the other end if I went with the former	8		5	Usually part of a chronic ear infection rather than acute	1		8	Not sure why people score this low as this is one of the presenting symptom	8	I suspect if you said irritation it might score better	2	Depends on severity, majority don't complain	8	Difficult as empirical treatment given by gp however by secondary care swab is necessary to rule out candida super infection from over treatment	7		7		7	More seen in chronic infections and over used medication and narrow canal, eczema	1		9	All depends if we can get a representative sample with appropriate swab	1	Not sure what this is applying mortality due to acute otitis externa? Not sure if it yield any useful data except confusing it with age related death in the cohort.	9	Very useful as compliance and the difference of prescribing topical v oral	2		1		8		9		6		9		1	See previous comments, depending on definition.	1
21	Junior doctor (below ST3)	2 weeks		7		4		7		1		7		7		7		4		7		7		6		1		6		4		6		6		6		5		5		5		5		5		5
22	ENT consultant - Otologist	6 weeks		3		8		7		2		7		7		3		8		7		8		8		1		7		7		8		7		6		3		6		6		6		4		5
23	ENT consultant - Otologist	12 weeks	To be in line with other conditions eg- sinusitis	1		8		5		1		5		6		4		2		7		7		5		1		7		9		7		5		3		3		7		4		6		4		2
24	ENT registrar	6 weeks		5		8		6		2		6		5		3		4		5		8		6		2		6		4		8		5		4		5		7		5		6		6		2
25	Audiologist	12 weeks		2		9		7		1		4		8		4		8		5		1		5		1		7		5		8		8		5		7		7		5		7		5		5
26	ENT registrar	6 weeks		5		9		7		1		4		7		6		7		7		7		7		1		7		7		7		5		4		5		7		5		7		9		7
27	ENT registrar	12 weeks		4		7		7		1		5		7		5		8		7		8		8		1		7		4		5		5		2		2		7		3		7		7		1
28	ENT consultant - Otologist	12 weeks	No consensus but as with chronic otitis media and chronic sinus infection 12 weeks is the excepted time frame from acute to subacute to chronic. This also allows for optimal treatment to be applied and adaptation to lifestyle changes	1	Numerous other conditions cause aural fullness therefore can cause conflict in particular TMD causes a host of symptoms not dissimilar to AOE	9		4	IN AOE the canal is very oedematous and full of debris. Granulation is a sign of more serious infection (NOE)	1	Too vague could come with a host of other medical conditions	8	Any condition that hampers with the natural amplification of sound by the outer and middle ear will result in a degree of conductive hearing loss. Therefore without a degree of loss would direct the clinician to seek other causes for otalgia again TMD	7	Very common complaint	3	For NOE this is significant however in AOE movement of the jaw should be normal but would potentially exacerbate otalgia	5	Not initially but if not responding to good cleaning, aural care then a swab of the skin surface may direct ongoing topical treatment. Often incidental as it is taken from the surface of debris and is not necessary a true representation of causative organsims	1	Secondary AOE from COM is malodourous very non-specific	4	BE careful TMD is also associated with tragal sensativity	5	Benign osteonecrosis, canal cholesteatoma, keratosis obturans also has debris and is not AOE	1	Too vague poor concentration comes with multiple co-existing potential conditions	4	Good cleaning, aural care and lifestyle changes more important	1	Many things can lead to ones demise not just AOE-very rare	9	Very important as this will have an impact on compliance rate and cure rate	9	QoL/PROM are important in any studies where there is medical intervention to prove efficacy	8	See above	7	See above	8	See above	3	This is slightly vague and less helpful than the above	8	See above	8		3	Too many other medical conditions can cause this and cause confussion
29	ENT consultant - Otologist	6 weeks		3		9		5		1		6		7		3		5		7		6		5		1		7		9		9		5		5		7		9		9		9		7		1
30	ENT consultant - Otologist	6 weeks	AOE can last easily unto to 4 weeks, with delay in seeing GP, incorrect empirical treatment, then possible Fungal OE. So 6 weeks is a reasonable cut off between AOE and COE.	5		9		4		2		7		8		7		7		7		8		3		4		7		1		7		7		6		1		7		1		3		7		1
31	ENT consultant - Otologist	6 weeks		3		3		5	high positive predictive but not essential for diagnosis	1		6		6		3		7		3		5		7		1		7		1		5		6		3		3		7		6		7		7		1
32	Microbiologist	6 weeks		6		9		5		1		5		8		3		1		8		5		5		4		2		9		9		7		7		8		8		5		7		8		4
33	ENT consultant - General / Non-otology	6 weeks		5		8		6		1		4		8		4		6		5		7		7		1		8		1	Could be excluded given that necrotising type is being excluded	7		5		2	This could be labelled as an activity of daily living	2	Too many confounders therefore better to exclude	8		3		8		7		2
34	ENT registrar	12 weeks	To allow for inadequate treatment and be in keeping with other chronic conditions such as CRS where an acute infective process should have resolved.	1		9		1		1		1		1		1		1		1		1		9	Keratin essential AND discharge/pain/itchiness AND short duration suggestive of infection rather than underlying dermatitic process	1		9		9		9		1		1		1		1		1		1		1		1
35	ENT registrar	6 weeks		3		8		8		1		5		7		7		6		7		8		9		1		7		9		8		8		6		8		8		7		8		7		1
36	ENT registrar	4 weeks		3		7		5		1		6		6		5		5		6		6		5		2		7		9		7		5		5		5		5		5		7		6		4
37	Nurse	12 weeks	more than 12 weeks /3 months	6		8		6		4		7		8		6		4		7		8		7		3		4		7		7		8		6		7		8		6		7		8		8
38	Nurse	6 weeks		5		5		5		1		7		7		7		7		7		7		8		3		8		9		8		6		6		6		7		6		7		7		6
39	ENT consultant - Otologist	6 weeks		2		8		3		1		4		7		1		1		2		5		8		1		7		1		7		4		1		1		1		1		2		3		1
40	ENT registrar	6 weeks		3		3		9		2		3		7		2		3		5		7		1		1		8		9		8		8		8		4		7		7		8		4		4
41	Microbiologist	12 weeks		3		7				3		3		6		3		7		6		7		3		3		7		8		8		7		3		7		7		7		7		3		3
42	Junior doctor (below ST3)	6 weeks		4		9		7		1		6		7		5		7		6		7		6		1		7		5		7		2		2		2		7		5		7		3		1
43	ENT registrar	6 weeks		2		8		4		1		3		6		3		6		7		7		7		2		8		8		6		7		2		6		6		2		7		5		3
44	ENT consultant - Otologist	4 weeks		5		9		2		1		7		7		5		7		7		9		4		2		5		1		9		6		5		5		8		6		8		8		5
45	Audiologist	4 weeks		3		8		6		1		4		6		5		8		6		7		4		1		8		8		7		2		2		4		4		1		2		8		3
46	Audiologist	6 weeks		4		7		8		3		7		9		6		9		8		6		6		2		8		4		6		2		5		7		7		5		7		6		4
47	ENT registrar	12 weeks		3	not specific enough for OE	9		7		1	too vague	5		8		6	relevant if chronic and ?MOE	7	important in refractory cases especially	8		6		9	an important finding on examination in OE	1		7		3	not important as a key item in general OE but important in MOE	7		3		5		6		8		6		7		6		1
48	GP	6 weeks		5		8		4		1		6		7		5		6		6		8		7		1		7		8		7		7		5		5		7		1		7		7		1
49	ENT registrar	12 weeks		1		5		1		1		1		5		1		5		1		7		9		1		8		9		3		1		1		1		1		1		1		1		1
50	ENT registrar	12 weeks		1		5		7		1		7		8		7		3		5		7		8		3		8		9		7		6		4		5		6		7		7		5		1
51	Junior doctor (below ST3)	6 weeks		3		7		8		5		4		3		2		8		5		8		8		2		8		9		6		6		4		6		4		2		2		2		2
52	ENT registrar	6 weeks		5		8		8		1		5		7		6		8		7		8		8		1		9		1		9		5		6		6		9		1		6		1		1
53	GP	4 weeks		3		9		7		1		6		5		4		8		8		6		3		1		9		1		8		5		3		5		7		5		7		5		5
54	Junior doctor (below ST3)	4 weeks		4		8		7		4		9		9		5		5		8		8		8		8		9		9		8		8		8		8		8		9		9		5		5
55	Audiologist	6 weeks		4		9		8		2		7		8		5		8		8		7		8		2		8		9		8		8		8		9		8		8		8		7		5
56	ENT consultant - Otologist	6 weeks		1		1		3		4		4		8		3		3		3		5		4		2		2		8		3		3		3		3		5		4		6		3		3
57	ENT consultant - General / Non-otology	6 weeks		5		7		8		1		6		7		5		7		7		7		8		1		7		1		7		6		5		5		5		1		1		5		1
58	Audiologist	6 weeks		7		8		8		1		9		7		5		7		9		7		3		3		7		9		9		8		8		9		7		7		9		9		4
59	ENT consultant - Otologist	6 weeks		2		8		8		4		3		6		7		7		5		7		5		3		9		9		7		5		3		3		6		3		3		3		6
60	ENT consultant - Otologist	6 weeks		6		7		6		1		8		8		2		8		8		7		8		1		8		3		8		8		6		7		8		6		7		7		1
61	Audiologist	6 weeks		2		9		8		1		5		8		5		8		8		8		8		1		9		9		8		5		5		6		6		5		7		7		5
62	ENT consultant - General / Non-otology	6 weeks		5		9		7		1		5		7		4		5		5		8		6		1		9		9		5		5		5		5		5		5		5		7		5
63	Microbiologist	4 weeks		2		8		6		3		4		8		9		6		6		8		6		5		8		6		9		8		6		8		8		7		8		5		6
64	Junior doctor (below ST3)	6 weeks		3		9		7		1		6		8		5		7		5		7		8		3		8		2		7		5		3		5		7		4		7		5		5
65	ENT consultant - General / Non-otology	6 weeks		7		9		5		3		8		7		7		6		6		8		7		5		8		6		5		5		5		6		7		5		5		6		5
66	ENT consultant - General / Non-otology	12 weeks		4		9		4		4		8		5		4		4		8		9		3		1		8		1		5		1		1		1		9		1		7		7		1
67	Microbiologist	6 weeks	Academically I had believed 4 weeks to be most appropriate cut-off, but accept that for pragmatic reasons there may be reduced specificity by using to early a cut-off hence modify to 6 weeks.	5		8		7		1		6		6		6		8		8		7		3		1		8		8		8		7		3		6		7		8		8		8		2
68	ENT consultant - Otologist	12 weeks		3		9		5		1		5		1		7		6		2		9		7		1		8		1		8		7		4		2		8		3		5		5		2
69	ENT registrar	6 weeks		5		9		7		1		5		9		4		6		7		7		6		3		7		8		7		6		5		5		6		7		8		7		2
70	Nurse	6 weeks		7		9		7		4		7		8		5		8		7		6		6		3		6		2		7		6		6		3		6		4		8		7		5
71	ENT registrar	6 weeks		2		8		2		2		6		8		2		7		7		7		2		2		7		8		8		7		7		6		7		2		7		2		2
72	ENT registrar	6 weeks		6		8		7		1		4		6		4		6		6		7		8		2		6		5		6		6		5		5		7		6		7		6		5
73	GP	12 weeks		5		9		7		1		7		7		5		8		7		7		5		1		7		9		7		6		6		6		7		5		7		7		5
74	Junior doctor (below ST3)	6 weeks		5		9		9		1		7		9		3		5		4		6		8		1		9		9		9		9		5		9		5		5		9		5		3
75	Audiologist	6 weeks		6		6		5		2		7		7		5		4		8		7		5		2		8		2		7		4		6		6		7		6		7		7		5
76	Audiologist	6 weeks		3		9		8		1		7		7		5		8		8		6		7		1		9		2		9		6		7		6		8		5		6		7		3
77	Audiologist	6 weeks		3		9		7		1		8		8		3		5		8		7		8		2		7		3		7		8		6		4		7		6		9		6		4
78	ENT registrar	9 weeks		5		9		5		1		7		7		2		2		6		7		4		2		3		1		7		7		5		4		8		8		8		7		3
79	ENT registrar	6 weeks		4		9		9		1		5		8		5		7		8		8		8		1		8		9		8		6		1		1		8		1		9		8		4
80	ENT registrar	12 weeks		4		8		9		3		5		6		5		9		8		7		5		5		7		9		8		9		7		8		8		7		8		8		5
81	GP	6 weeks		3		8		2		1		6		3		4		7		6		7		8		1		7		1		7		7		2		3		7		5		5		5		2
82	ENT consultant - Otologist	4 weeks		1		8		9		1		2		5		3		8		8		6		8		2		9		9		8		5		5		2		3		3		4		5		3
83	Junior doctor (below ST3)	6 weeks		5		8		8		6		8		8		6		8		7		4		5		6		7		4		7		6		7		6		7		7		6		7		7
84	Junior doctor (below ST3)	6 weeks		5		9		6		3		6		7		6		7		7		7		5		3		8		7		6		5		5		5		7		6		7		7		5
85	ENT consultant - General / Non-otology	6 weeks		3		9		4		1		3		7		3		6		7		5		6		2		5		9		7		7		7		8		9		6		7		4		5
86	GP	6 weeks		3		8		4		1		5		8		5		7		8		7		5		1		8		8		8		4		6		7		7		5		7		7		3
87	ENT consultant - Otologist	6 weeks		1		3		1		1		4		4		3		1		3		5		7		1		7		9		7		5		1		3		4		1		3		7		1
88	ENT consultant - General / Non-otology	6 weeks		4		8		7		1		6		7		3		6		7		6		8		2		8		7		8		6		3		5		8		6		8		6		3
89	ENT consultant - Otologist	6 weeks		3		9		7		1		5		7		5		7		7		8		7		1		8		9		7		5		5		5		5		3		5		5		5
90	ENT registrar	8 weeks	Taking into account time for microbe targeted therapy and ear care delivery	5		7		6	More likely becoming chronic?	1		7		8		3		7		8		8		6	Debris generally yes	1		9		9	Major outcome as mortality should be exceptional so need to find out whether any causality in these patients linked to OE	7		7		5		7		7		4		8		9		1
91	ENT consultant - Otologist	6 weeks		5		9		7		4		6		5		4		4		5		6		8		4		7		9		6		4		5		4		6		5		7		5		5
92	Junior doctor (below ST3)	4 weeks		9		9		7		4		7		8		6		8		7		8		6		1		5		8		8		5		6		5		7		4		8		8		6
93	Nurse	12 weeks	Time is needed to ensure that patient is on correct treatment	5		9		7		6		6		8		5		9		8		8		8		2		9		5		7		6		5		6		7		6		8		7		5
94	ENT consultant - General / Non-otology	6 weeks		3		7		5		1		3		3		2		3		6		8		8		3		4		9		8		7		7		4		7		3	Similar to daily activities. It should be kept general	3	Similar to daily activities. It should be kept general	5		2
95	ENT registrar	12 weeks		1		9		1		1		1		1		1		1		9		9		9		1		9		1		7		9		9		9		9		9		9		1		1
96	ENT consultant - General / Non-otology	12 weeks		5		7		6		2		6		7		6		5		6		6		6		2		6		1		6		6		4		5		6		5		5		7		4
97	GP	6 weeks		1		8		8		2		6		8		5		4		7		8		5		1		7		1		8		2		2		1		2		1		1		1		1
98	ENT registrar	6 weeks		1		7		8		2		7		8		2		9		7		9		4		3		9		9		9		7		6		1		4		1		4		5		3
99	ENT registrar	6 weeks		6		8		7		4		5		6		8		9		4		9		7		3		9		1		8		6		6		7		8		5		7		6		4
[truncated: 28 more columns]

## Sheet: Pro_Round 3
ID	Please select you stakeholder group	From the onset of symptoms, treated or untreated acute otitis externa should be considered to have become ‘chronic’ after…	Comments	Aural fullness	Unable to score/comments	External auditory canal granulations	Unable to score/comments	Hearing impairment	Unable to score/comments	Jaw pain	Unable to score/comments	Microbiological identification of an organism	Unable to score/comments	Odour related to the ear	Unable to score/comments	Squamous debris/keratin	Unable to score/comments	...on improvement in the ability to concentrate	Unable to score/comments	...if patients died during treatment	Unable to score/comments	...on improvements in reactive over-healing in the ear canal (called granulations)	Unable to score/comments	...on any impact on activities of daily living or performing household task	Unable to score/comments	...on any impact on ability to care for the family (for adults)	Unable to score/comments	...on any impact on mental health	Unable to score/comments	...on any impact on sleep	Unable to score/comments	...on any impact on the ability to socialise	Unable to score/comments	...on any impact on the ability to work	Unable to score/comments	...on improvements in a feeling of fullness in the ear (aural fullness)	Unable to score/comments	...on improvements in a feeling of generalised weakness	Unable to score/comments	...on any impact on hours of bed rest	Unable to score/comments	...on improvements in pain in the jaw	Unable to score/comments	...on improvements in the feeling of anxiety	Unable to score/comments	...on improvements in any odour relating to the ear	Unable to score/comments	...on patient satisfaction with the time required for outpatient appointments	Unable to score/comments
1	ENT registrar	12 weeks		1		5		3		1		1		5		8		1		9		7		4		4		1		8		1		8		1		1		1		1		1		5		5
2	ENT registrar	6 weeks		3		7		3		3		3		7		3		1		9		7		5		1		1		7		1		3		3		1		1		1		1		5		1
3	ENT registrar	6 weeks		1		9		1		1		1		9		9		1		9		9		9		1		9		9		9		9		9		1		9		9		9		9		9
4	ENT consultant - General / Non-otology	6 weeks		2		2	granulation would indicate NOE to me, not OE discussed here	3		2		2	OE is a clinical diagnosis	2		2		1		2		3		2		2		2		7		1		1	too subjective to be meaningful	1		1	too subjective to be meaningful	1	too subjective to be meaningful	1		1	too subjective to be meaningful	1		1	too subjective to be meaningful
5	ENT consultant - Otologist	6 weeks		1		9		1		1		1		5		9		1		9		9		1		1		1		9		1		9		5		1		1		9		1		9		9
6	Junior doctor (below ST3)	6 weeks		5		6		6		4		7		7		6		2		1		7		6		4		4		8		2		8		7		1		7		6		3		8		6
7	Audiologist	6 weeks		5		7		6		5		7		7		8		1		9		7		6		5		5		7		5		8		7		1		5		7		1		7		7
8	ENT consultant - Otologist	12 weeks		3		7		6		3		7		7		8		1		1		7		5		5		5		7		5		7		7		1		1		7		1		7		1
9	ENT consultant - Otologist	6 weeks		1		3		2		2		1		6		8		1		1		3		5		1		1		1		2		4		1		1		1		2		1		7		7
10	ENT consultant - Otologist	6 weeks		3		7		7		3		7		7		7		7		7		8		5		5		5		7		5		8		7		3		5		5		3		8		8
11	ENT consultant - General / Non-otology	6 weeks		2		2	Notably for malignant otitis externa	6		3		6		7		8		7		9		6		7		8		7		8		7		8		7		6		6		7		1		8		6
12	ENT consultant - Otologist	6 weeks		2		7		6		2		3		5		7		1		5		7		7		3		3		3		1		2		5		2		2		2		2		7		2
13	ENT consultant - Otologist	6 weeks		3		7		6		5		8		7		8		1		9		8		7		6		5		8		7		8		8		5		5		6		6		8		8
14	GP	6 weeks		7		7		3		5		7		7		8		1		1		7		5		5		5		7		5		8		7		8		1		7		5		5		5
15	ENT consultant - General / Non-otology	4 weeks		8		3		8		7		4		8		6				9		6		3		2		2		7		5		5		7		2		3		6		6		8		8
16	ENT registrar	6 weeks		3		7		7		3		3		7		7		1		1		7		7		6		7		8		5		8		6		1		1		3		3		8		7
17	ENT registrar	6 weeks		3		6		6		3		8		6		4		1		8		6		8		5		2		3		4		7		5		4		1		1		1		2		2
18	ENT registrar	6 weeks		3		7		6		4		7		7		7		1		9		8		6		5		4		8		6		8		7		2		4		4		2		8		7
19	ENT consultant - Otologist	12 weeks	Can get superimposed fungal infections after a bacterial infection but it’s still acute. 12 wks also matches COM and Chronic Sinusitis timescales.	1	Usually due to ETD	3	Only in severe OE. Usually with NOE	5		5		1	Swabs rarely done unless no improvement with first line topical treatment	5		3		1		1		7		1		1		1		7		1		5		5		1		1		7		1		7		5
20	ENT registrar	12 weeks		5		6		6		4		7		7		9		1		1	If the patient died from acute diffuse otitis externa, excluding skull base osteomyelitis, it would probably be from a reaction to the medication rather than inadequate treatment of the condition	7	Difficult to quantify, as the patients are often seen by different clinicians. There will likely also be significant intraobserver variability without otoendoscopic photos to compare.	7		5		6		7		5		8		7		1		6		7		1		8		8
21	ENT registrar	8 weeks		7		7		7		5	Maybe sign of noe	7		7		6		7	Should have a COS and a PROM	9	Key outcome	5		7	Prom	7	Prom	7	Prom	7	Prom	7	Prom	7	Prom	7	Cos	2		3		6	Noe	4		7		7
22	ENT registrar	6 weeks		6		6		6		4		6		5		7		4		7		7		7		5		4		5		5		7		6		5		5		5		1		7		7
23	ENT registrar	6 weeks		2		5		4		3		6		7		6		2		7		6		5		3		4		7		4		6		5		3		4		4		2		7		5
24	GP	6 weeks		3		4		4		3		4		6		3		1		9		7		4		5		5		7		4		7		7		2		1		3		1		7		6
25	ENT consultant - General / Non-otology	6 weeks		5		8		8		3		7		8		7		1		1		8		3		2		1		8		5		8		7		1		1		2		1		8		8
26	Audiologist	12 weeks		1		4		4		1		8		6		7		1		1		7		5		5		5		6		5		7		5		5		5		1		5		6		8
27	ENT registrar	6 weeks		3		6		6		5		7		6		7		2		3		6		4		5		5		6		2		7		6		3		3		6		2		7		7
28	GP	6 weeks		3		5		6		5		4		5		7		1		9		5		5		3		3		7		1		7		7		1		1		7		1		7		7
29	ENT consultant - Otologist	6 weeks	I think waiting for three months ie 12 weeks (as with middle ear and sinus) is too long and opens the potential in the right population group for serious pathology. 6 weeks suffices	2	Host of other pathology can cause this in particular TMD (associated pain as well)	5	This would lead to an index of suspicion of NOE	8	I think this is important. You cannot physically occlude the canal without losing a degree of hearing. this would help differentiate other conditions such as TMD	1	Trismus with normal canal probable TMD	1	Often due to oedema difficult to obtain a true pathogenic organism in acute setting. If does not respond to good toileting, empirical treatment and aural care (water soap foreign body avoidance) then swab more important	8	Odour makes you think more of a middle ear process such as cholesteatoma driving the process be aware of malignancy too	8		2	to vague and many things can affect concentration	1	Again too vague many things can lead to death	8	Can be nuisance and lead to further debridement and visits	6		5	Vague as many things not just the ear can affect this aspect difficult to quanitify	4	Again many issues can affect mental health and not just a single episode this could be difficult to tease out and may not be solely related to AOE	9	This is a painful condition and although many factors can affect quality of sleep this could certainly aggravate the situation	5		9		3	Fullness could be TMD, SCDS, early otosclerosis ETD too avgue	1	Too vague	1	Catastrophiser v stoic some people fall to bits others just get on with it difficult to quantify	2	AOE should not cause jaw pain unless it has spread	1	Too vague	8		8
30	ENT consultant - Otologist	6 weeks		3		4		6		3		7		5		6		1		5		7		6		3		2		8		7		7		7		1		1		1		1		7		5
31	ENT registrar	6 weeks		2		7		6		5		8		7		8		2		9		8		8		4		4		7		3		8		8		2		1		6		1		7		8
32	Junior doctor (below ST3)	6 weeks		3		6		6		5		8		7		7		3		7		7		7		5		5		8		6		7		7		3		3		5		3		7		8
33	ENT consultant - General / Non-otology	6 weeks		3		7		5		3		7		7		7		2		1		8		6		4		3		7		7		7		7		1		3		5		1		7		7
34	ENT consultant - Otologist	6 weeks		3		8		7		2		8		8		8		9		9		9		7		1		8		9		9		9		2		1		1		1		1		9		9
35	Junior doctor (below ST3)	6 weeks		5		6		6		4		4				6		4		4		6		6		5		5		7		6		6		6		6		7		6		6		6		6
36	ENT registrar	6 weeks		1		7		5		1		5		8		9		1		9		8		7		6		6		7		3		8		1		1		1		1		1		8		8
37	Junior doctor (below ST3)	4 weeks		5		5		5		5		7				8		7		9		9		9		9				8		8		8		7		3		2		7		2		8		8
38	ENT consultant - Otologist	6 weeks		2		6		5		5		5		7		5		5	Interesting that the patients score this highly, but then they would, which beggars the question about its importance to us as physicians in this day of patient-centred outcomes...	9		8		6		5		6		8		5		8		7		3		7		6		2		8		7
39	ENT registrar	6 weeks		3		8		7		2		8		8		8		1		9		8		8		1		7		7		1		8		1		1		1		7		1		8		7
40	ENT consultant - General / Non-otology	6 weeks		8		7		6		7		8		5		7		1		9		7		5		5		6		6		5		6		7		5		6		7		5		7		5
41	ENT registrar	6 weeks		6		5		7		4		6		8		7		2		9		7		8		2		4		8		8		8		5		3		4		6		2		8		8
42	ENT consultant - Otologist	6 weeks		3		6		6		3		4		6		8		1		1		7		3		3		3		7		2		7		6		1		1		3		1		7		6
43	ENT registrar	6 weeks		3		8		3		3		8		8		8		3		8		8		6		6		2		9		3		9		7		1		1		6		1		8		9
44	Nurse	12 weeks		8		7		8		6		7		8		8		5		6		8		7		7		6		7		5		6		8		6		6		7		6		8		8
45	Junior doctor (below ST3)	6 weeks		3		6		9		6		9		6		7		1		9		9		9		9		9		9		9		9		6		4		4		9		4		5		9
46	Microbiologist	6 weeks		5		7		5		5		4	very dependent on type of sample - swab is essentially a skin swab so will not be sterile; pus/discharge more useful; however, probably only more important in guiding choice of antimicrobials in resistant cases	7		6		7		9		7		7		7		7		7		7		7		8		4		4		7		5		7		6
47	Junior doctor (below ST3)	6 weeks		3		8		5		3		8		4		7		1		8		8		7		5		5		7		4		6		5		1		3		4		2		5		6
48	Audiologist	4 weeks		2		7		3		2		8		7		7		1		8		8		7		5		5		8		7		7		7		1		5		7		1		8		8
49	Junior doctor (below ST3)	6 weeks		1		8		1		1		9		1		8		8		9		8		9		9		9		9		9		9		9		1		1		1		1		9		9
50	ENT registrar	6 weeks		2		4		6		3		8		6		8		1		9		7		7		4		6		7		4		7		4		2		6		3		1		7		2
51	ENT consultant - Otologist	6 weeks		3		7		6		4		6		7		7		2		8		7		7		5		5		7		7		7		5		5		6		7		4		8		7
52	ENT registrar	6 weeks		3		8		6		4		8		8		6		8		9		5		9		5		5		9		5		9		7		4		4		7		1		9		7
53	ENT consultant - Otologist	12 weeks	Chronic rhinosinusitis is defined as 3 months or more so this should be the same for AOE	1	this is not clinically relevant in my opinion		any signs of granulation should suggest a more serious pathology than AOE therefore shouldn't be part of the definition of AOE	3	hearing impairement is likely to be present but the other clinical symptoms/signs (ear canal appearance) are more useful	3	again the other other symptoms already identified are more useful than this	4	swabs are often non diagnostic therefore shouldn't be part of the definition of AOE.	4	odour is not always present; may be helpful to suggest the potential organism only	5	Although you often find keratin in AOE, I think this term should be reserved for cholesteatoma	1	I don't see how this should be relevant as there will be lots of other factors that will contribute to this apart from AOE	1	If we are talking about NOE, then yes it should be an outcome. However not for AOE!	4	I think if granulations are present, this should raise naturally raise the suspicion that the condition is more than a "simple" AOE therefore shouldn't be part of the outcome set for AOE.	3	other factors will contribute to this apart from AOE symptoms	4	other factors will contribute to this apart from AOE symptoms	4	other factors will contribute to this apart from AOE symptoms	6	disturbed sleep from pain can help distinguish those AOE cases that may be more difficult to treat	4	other factors will contribute to this apart from AOE symptoms	4	other factors will contribute to this apart from AOE symptoms	1		1		4		1		1		4		6
54	ENT consultant - Otologist	12 weeks		5		1	I think if there is granulation tissue in "Acute" OE, this should raise a suspicion of NOE which is excluded from this survey.	6		6		1	it is a good positive. It is a sign of infection but its absence does not rule out AOE.	1		7		1		1		5		5		1		1		7		1		7		4		1		1		1		1		1		1	this is not specifically relevant to the disease as it is criteria for the health care provision and will be different between different countries and can not be commented on Private patients for example.
55	ENT registrar	6 weeks		5		7		6		3		7		7		8	In terms of debris, I don't find squamous debris the most useful finding in making the diagnosis. Other types of debris, such as that seen in a fungal infection, can be almost diagnostic in itself.	1		9		7		5		5		5		7		5		7		7		1		1		7		1		7		7
56	ENT consultant - General / Non-otology	4 weeks		7		6		7		5		7		6		7		5		7		8		7		8		6		7		7		7		8		6		5		6		5		8		7
57	ENT registrar	6 weeks		3		4		5		3		6		7		6		1		6		7		6		5		5		7		5		8		6		1		4		4		1		7		6
58	ENT registrar	6 weeks		3		7		7		5		7		7		8		2		8		7		6		6		5		7		6		7		7		5		5		6		1		7		7
59	Nurse	6 weeks		7		7		6		5		7		7		8		4		6		6		5		6		7		6		6		7		6		7		5		5		6		6		6
60	ENT registrar	12 weeks	Nice article: https://www.ncbi.nlm.nih.gov/pmc/articles/PMC4969287/. May be better to call it persistent (under/mistreated) or recalcitrant (properly treated)	1		1	this is a sign for NOE	1	neither sensitive nor specific for OE	7		3		2		6		1		8		7		8		8		7		8		8		7		7		2		7		7		2		2		7
61	ENT consultant - General / Non-otology	6 weeks		5		8		7		5		7		7		8		1		9		7		6		6		6		8		5		7		7		5		5		6		5		8		8
62	GP	6 weeks		5		4		5		3		7		7		6		1		5		7		5		5		7		7		5		9		5		1		2		5		2		7		7
63	Audiologist	4 weeks		2		6		6		3		7		7		7		2		9		7		5		5		5		2		6		7		7		2		4		3		2		4		3
64	Microbiologist	6 weeks		3		7		6		4		7	although this is dependent upon which organism isolated, not just the presence of an organism	8		5		7		8		7		6		6		7		8		7		8		7		4		5		6		4		8		7
65	Audiologist	6 weeks		5		8		7		4		8		8		8		2		9		8		8		7		8		8		8		8		7		5		4		7		6		8		7
66	Microbiologist	6 weeks		2		3		4		2		2		4		2		7	Not an obvious clinical outcome but an important one for patients	2		7		8		6		7		8		8		8		5		3			Unable to score	5		3		8		7
67	ENT registrar	6 weeks		7		7		7		5		6		8		8		1		7		7		4		5		6		8		5		7		7		1		4		6		1		8		5
68	ENT consultant - General / Non-otology	6 weeks		5		7		7		5		7		6		8		2		9		7		5		5		5		7		5		7				5		4		6		1		7		7
69	Nurse	6 weeks		5		3		6		5		6		7		6		1		7		7		6		5		5		7		5		7		7		1		5		6		1		7		7
70	GP	6 weeks		2		7		5		2		8		8		8		1		9		7		5		5		5		7		5		7		7		1		1		5		1		7		5
71	Junior doctor (below ST3)	6 weeks		4		7		6		3		7		4		8		2		9		7		5		4		5		7		5		8		5		5		6		5		3		3		7
72	GP	6 weeks		2		3		4		2		7		7		7		2		2		7		6		4		2		7		3		6		3		2		4		4		1		7		2
73	ENT registrar	6 weeks		5		7		6		5		8		7		8		1		9		7		6		5		5		7		5		7		7		1		1		6		1		7		7
74	Junior doctor (below ST3)	6 weeks		3		9		7		8		8		6		8		6		8		8		7		8		8		8		5		8		7		7		7		7		5		6		6
75	ENT consultant - General / Non-otology	12 weeks		1		8		4		1		1		1		1		1		1		1		6		1		1		7		1		7		1		1		1		1		1		1		1
76	ENT consultant - Otologist	6 weeks		2	this symptom refers to ET dysfunction/Meniere's/SSCD syndrome, not for OE	3	again granulations (rather than aural polyp) is key for the diagnosis of NOE rather than uncomplicated OE	6		5		8		6		5		1	such a vague symptom. Any condition that causes pain will cause reduction in the ability to concentrate	1		6		5		5		1		7		1		8		5		1		1		4		1		7		1
77	Nurse	12 weeks		5		7		5		4		9		8		8		5		9		7		8		6		6		7		7		8		7		5		5		7		7		8		8
78	ENT consultant - Otologist	12 weeks	I originally stated 12 weeks because i think it then follows the time frame of other recognised acute vs chronic conditions such as CRS, this makes it easy to remember and avoids confusion. Also with burdens on NHS - many patients are not seen by ENT until well after 6 weeks as they are usually managed by primary care - this would mean a lot of patients getting labelled as chronic when in fact th…	2		7		8	Usually patient complain from the onset of symptoms and usually one of the last symptoms to completely normalise after resolution.	2		7	Can be useful in refractory cases or if suspect fungal. Also can guide primary care treatment.	6	Usually more apparent in chronic cases especially pseudomonas.	8		1	This is very subjective with many other confounding factors.	7	Unlikely to be caused by the ear.	8		6	Likely some variability.	3	May not be relevant.	7		8		3		8		3		1		2		2		2		6		8
79	ENT consultant - General / Non-otology	12 weeks		1		8		3		3		4		5		9		3		3		4		4		4		4		6		5		6		5		3		4		4		3		7		5
80	Audiologist	6 weeks		3		7		7		4		7		7		8		3		9		7		6		6		5		9		6		8		8		3		4		7		3		9		7
81	GP	6 weeks		4		8		5		4		4		7		8		1		9		9		8		8		5		8		8		9		8		5		7		7		3		7		7
82	Junior doctor (below ST3)	6 weeks		3		8		7		5		7		6		7		5		5		7		7		5		5		7		6		8		7		3		5		5		5		7		7
83	GP	6 weeks		5		7		6		5		7		7		8		6		5		7		9		6		6		9		9		9		7		7		5		6		8		7		7
84	Audiologist	9 weeks		7		6		8		6		6		8		7		1		3		7		7		5		6		7		7		7		8		6		6		5		6		7		8
85	Audiologist	7 weeks		3		7		7		4		8		8		8		1		2		7		6		6		6		7		5		7		7		3		1		7		2		7		8
86	ENT registrar	6 weeks		5		8		5		5		7		8		8		1		9		7		6		1		2		7		1		7		8		1		4		8		1		9		9
87	ENT registrar	12 weeks		5		6		6		5		8		7		5		3		5		6		6		5		5		7		6		7		5		2		5		6		5		6		5
88	ENT consultant - Otologist	4 weeks		7		2		7		5		7		7		5		2		1		6		6		5		5		8		6		9		8		5		8		6		4		8		8
89	ENT registrar	12 weeks		7		5		8		4		9		8		7		4		9		8		8		8		9		9		7		8		9		4		7		8		1		9		9
90	Microbiologist	4 weeks		7		3		5		8		7		6		2		3		4		7		7		7		6		7		7		7		8		5		6		8		6		7		6
91	Audiologist	9 weeks		2		7		5		3		8		8		9		1		9		7		8		7		6		9		7		7		8		8		5		7		6		7		7
92	ENT consultant - Otologist	6 weeks		6		6		5		5		3		6		6		1		3		7		8		5		6		8		6		8		5		2		4		6		5		7		7
93	ENT consultant - Otologist	6 weeks		4		5		6		3		6		3		5		1			Patient should not die because of Non complicated AOE. Patient may die during the treatment due to some other reason and this should not affect the outcome measures	6		6		3		5		7		1		7		8		1		6		5		1		8		8
[truncated: 2 more columns]

## Sheet: Pt_Round 1
ID	...on improvement in the ability to concentrate	Unable to score/comments	...on results of bacterial or fungal growth on an ear swab	Unable to score/comments	...if patients completed the course of treatment	Unable to score/comments	...if patients were compliant with the treatment	Unable to score/comments	...if patients died during treatment	Unable to score/comments	...on improvements in discharge from the ear (otorrhoea)	Unable to score/comments	...on improvements in reactive over-healing in the ear canal (called granulations)	Unable to score/comments	...on improvements in ear canal redness (erythema)	Unable to score/comments	...on improvements in ear canal swelling (oedema)	Unable to score/comments	...on improvements in ear pain (otalgia)	Unable to score/comments	...on the ease of applying the treatment	Unable to score/comments	...on any impact on activities of daily living or performing household task	Unable to score/comments	...on any impact on ability to care for the family	Unable to score/comments	...on any impact on mental health	Unable to score/comments	...on any impact on sleep	Unable to score/comments	...on any impact on the ability to socialise	Unable to score/comments	...on any impact on the ability to work	Unable to score/comments	...on improvements in a feeling of fullness in the ear (aural fullness)	Unable to score/comments	...on improvements in a feeling of generalised weakness	Unable to score/comments	...on improvements in hearing impairment	Unable to score/comments	...on any impact on hours of bed rest	Unable to score/comments	...on improvements in itchiness	Unable to score/comments	...on improvements in jaw pain	Unable to score/comments	...on improvements in the feeling of anxiety	Unable to score/comments	...on any local side effects of treatments
1	8		9		9		9		5		7			Not sure what this is	9		9		9		5		9		9		9		9		9		5		8		5		9		5		9		5		5		5
2	2		6		8		9		8		8		6		7		7		6		6		5		2		1		3		4		5		7		1		9		2		6		2		2		3
3	6		6		7		7		2		6		6		7		7		7		6		5		5		6		8		6		6		5		6		6		4		7		5		5		6
4	6		7		8		8		5		9		8		7		7		8		6		6		6		6		7		7		7		8		6		9		5		7		6		6		8
5	3		7		7		8		5		7		8		8		9		9		8		9		9		8		9		9		9		8		8		8		8		8		9		8		8
6	6		8		9		9		9		9		7		7		8		9		6		9		6		7		9		6		9		5		6		8		5		9		8		6		9
7	9		5		9		5		9		9		9		9		9		9		5		7		7		9		7		6		7		7		7		9		7		7		7		8		7
8	8		9		9		9		9		9		9		9		9		9		9		9		9		9		9		9		9		9		9		9		9		9		9		9		9
9	7		8		6		7				8		5		7		7		7		7		9		6		7		8		9		9		7		8		6		8		6		7		9		4
10	6	Constant buzzing noise	5	Had loads done never been told the results	9		9		1		7	Leaks most days especially at night			6	Told most times it looks red and angry	4		9	When it flares up the pain is at it worst	5	Nothing seems to clear it up or if it does it's back within no time	8	Yes dizziness headaches and unable to hear	4	Unable to hear people	6	Dont want to engage in conversation as I cant always hear and the way my ear looks and smells at times	5	Liquid running down my face and buzzing	8	Unable to hear when in conversation and just a constant buzzing			9	All the time until I have it cleaned out by the ENT doctor last a couple of days top	7	Feel like giving up been complaining of this for nearly 3 year	9	All the time	4		9	Drives me mad every day	3	When it gets really bad	5		1
[truncated: 36 more columns]

## Sheet: Pt_Round 2
ID	...on improvement in the ability to concentrate	Unable to score/comments	...on results of bacterial or fungal growth on an ear swab	Unable to score/comments	...if patients died during treatment	Unable to score/comments	...on improvements in reactive over-healing in the ear canal (called granulations)	Unable to score/comments	...on the ease of applying the treatment	Unable to score/comments	...on any impact on ability to care for the family	Unable to score/comments	...on any impact on mental health	Unable to score/comments	...on any impact on the ability to socialise	Unable to score/comments	...on any impact on the ability to work	Unable to score/comments	...on improvements in a feeling of generalised weakness	Unable to score/comments	...on any impact on hours of bed rest	Unable to score/comments	...on improvements pain in the jaw	Unable to score/comments	...on improvements in the feeling of anxiety	Unable to score/comments	...on any local side effects of treatments	Unable to score/comments	...on the need for overnight or in-hospital care	Unable to score/comments	...on improvements in any odour relating to the ear	Unable to score/comments	...on any widespread (systemic) side effects of pain relief	Unable to score/comments	...on any widespread (systemic) side effects of treatments	Unable to score/comments	…the time to resolution of symptoms	Unable to score/comments
1	7		9		4		7		8		8		9		9		9		7		8		9		8		7		7		8		8		8		9
2	8		7						7		6		6		8		8		7		9		6		9		7		9		7		6		6		9
3	6		9		5		6		6		6		7		9		9		7		5		7		8		6		7		8		8		7		7
4	6		8		5		7		7		4		6		4		6		5		5		2		1		5		8		6		5		6		8
5	6		5		9		5		7		6		5		5		8		5		4		5		5		9		9		9		6		9		9
6	7		6		5		9		7		5		7		7		9		6		8		6		6		8		7		7		8		8		8
7	8		8		9		8		6		9		6		9		9		6		5		6		6		8		5		9		8		8		9

## Sheet: Pt_Round 3
ID	...on improvement in the ability to concentrate	Unable to score/comments	...if patients died during treatment	Unable to score/comments	...on improvements in reactive over-healing in the ear canal (called granulations)	Unable to score/comments	...on any impact on activities of daily living or performing household task	Unable to score/comments	...on any impact on ability to care for the family (for adults)	Unable to score/comments	...on any impact on mental health	Unable to score/comments	...on any impact on sleep	Unable to score/comments	...on any impact on the ability to socialise	Unable to score/comments	...on any impact on the ability to work	Unable to score/comments	...on improvements in a feeling of fullness in the ear (aural fullness)	Unable to score/comments	...on improvements in a feeling of generalised weakness	Unable to score/comments	...on any impact on hours of bed rest	Unable to score/comments	...on improvements in pain in the jaw	Unable to score/comments	...on improvements in the feeling of anxiety	Unable to score/comments	...on improvements in any odour relating to the ear	Unable to score/comments	...on patient satisfaction with the time required for outpatient appointments	Unable to score/comments	...on any widespread (systemic) side effects of pain relief	Unable to score/comments
1	1		9		7		9		6		6		7		9		9		8		7		8		6		8		6		7		7
2	6		8		8		8		6		6		8		7		8		8		7		8		6		6		7		8		8
3	6		9		7		4		3		7		7		6		6		8		7		6		5		2		5		3		6
4	5		9		7		8		6		6		8		8		8		8		4		5		7		5		8		7		8
5	6		4			Unsure of question	8		7		7		8		9		9		7		4		7		7		8		7		8		8
6	6		9		5		6		5		5		5		5		9		3		6		5		6		2		7		7		8
