# Supplementary material for: Acute otitis externa: Consensus definition, diagnostic criteria and core outcome set development
Source: PLoS One. 2021 May 14;16(5):e0251395. doi: 10.1371/journal.pone.0251395 (PMC8121300; doi:10.1371/journal.pone.0251395)
Supplement: S1 Table — (XLSX) [file pone.0251395.s003.xlsx]

## Sheet: S1 Table
Authors	Title	Year	OE definition	Diagnosis criteria	Outcomes
Abelardo E, Pope L, Rajkumar K et al.	A double-blind randomised clinical trial of the treatment of otitis externa using topical steroid alone versus topical steroid-antibiotic therapy	2009	Presence of oedema, discharge or debris in the outer ear canal	Clinical assessment	Otalgia, no of times drops used, side effects of treatment (not classified)
Adhikari P, Bhatta R, Bhandari S et al.	Comparison of steroid antibiotic pack and 10% ichthammol glycerine pack in relieving pain of acute otitis externa in children	2011	Diagnosis of acute otitis externa is made on clinical features alone, although microbial evidence is sought in refractory cases. Patients commonly present with a history of earache, itchiness, ear discharge and hearing loss. Examination findings usually show a narrow, tender and erythematous external auditory canal.	By history and examination of each patient.	Need for urgent care, EAC oedema, tragal tenderness
Amani S and Moeini M.	Comparison of boric acid and combination drug of polymyxin, neomycin and hydrocortisone (Polymyxin NH) in the treatment of acute otitis externa	2016	Acute otitis externa is an inflammation of the external auditory canal	Pain, ear discharge, ear canal inflammation, auricle swelling	Otalgia, otorrhoea, hearing loss, pruritus, EAC odema
Ansley J and Lebel C	Treatment of acute otitis externa: Oto-201 phase 3 results	2018	Not defined	Not specified	Ear symptoms (not classified), Ear examination findings (not classified), Side effects of treatment (not classified)
Burton M, Singer M, Rosenfeld RM	Extracts from The Cochrane Library: Interventions for acute otitis externa	2010	Acute otitis externa is an inflammatory condition of the ear canal, with or without infection	Symptoms include ear discomfort, itchiness, discharge, and impaired hearing	Not specified
Demir D, Yilmaz MS, Guven M et al.	Comparison of clinical outcomes of three different packing materials in the treatment of severe acute otitis externa	2018	Diffuse or localised inflammation of the external auditory canal	Otalgia, pinna or tragal tenderness, erythema, and the presence of an occluded external auditory canal	Otalgia, EAC oedema, side effects of treatment (not classified)
Drehobl M, Guerrero J, Lacarte PR et al.	Comparison of efficacy and safety of ciprofloxacin otic solution 0.2% versus polymyxin B-neomycin-hydrocortisone in the treatment of acute diffuse otitis externa	2008	Acute otitis externa is an inflammatory process of the external auditory canal	Pain and itching	Otalgia, ear examinatio findings (not classified)
Guven M, Demir D, Yilmaz MS et al.	Different packings in acute otitis externa management	2018	Not defined	Not specified	Otalgia, EAC oedema, EAC erythema, tragal tenderness
Hornigold R, Gillett D, Kiverniti E et al.	The management of otitis externa: a randomised controlled trial of a glycerol and icthammol ribbon gauze versus topical antibiotic and steroid drops	2008	Not defined	Otorrhoea, otalgia and hearing loss, signs of external auditory meatus infammation or exudate.	Otalgia, hours off work
Johnston MN, Flook EP, Mehta D et al	Prospective randomised single-blind controlled trial of glacial acetic acid versus glacial acetic acid, neomycin sulphate and dexamethasone spray in otitis externa and infected mastoid cavities	2006	Acute onset of generalised inflammation of external auditory canal skin. Infec- ted mastoid cavities were defined as moist cavities with cavity wall inflammation.	Not specified	Ear examination findings (not classified)
Kantas I, Balatsouras DG, Vafiadis M et al.	The use of trichloroacetic acid in the treatment of acute external otitis	2007	The prevailing symptoms and signs are otal- gia, hearing impairment, itching and OEC discharge. In severe cases pinna cellulitis and obstructive edema of the OEC, with or without lymphadenitis, may be evident. Extreme tenderness of the region of the tragus is usually observed in these cases	The diagnosis of otitis externa was made on clinical grounds, by observing on otoscopy an edematous ear canal with moist keratin debris within it, with presenting symptoms of pain, hearing impairment and ear discharge	EAC erythema, otalgia, side effects of treatment (not classified)
Kaushik V, Malik T, Saeed SR	Interventions for acute otitis externa	2010	Otitis externa is a broad term used to describe an inflammatory condition affecting the ear canal, with or without infection. The inflammation is usually generalised throughout the ear canal and can affect the outer ear	Symptoms include ear discomfort, itchiness, discharge and impaired hearing.	Otalgia, otorrhoea, pruritis, EAC erythema, EAC oedema, otorrhoea, swab culture, side effects of treatment
Kim J and Cho JH.	Change of external auditory canal pH in acute otitis externa	2009	OE is a diffuse inflammation of the external auditory canal (EAC)	Symptoms - Otalgia, itching, fullness, hearing loss, jaw pain. Signs - tenderness of the tragus and pinna, diffuse ear canal edema and erythema, otorrhea, regional lymphadenitis, tympanic membrane erythema, cellulitis of the pinna and adjacent skin, etc. patients were grouped into 1 of 3 degrees of AOE, namely, mild, moderate, or severe. A case was considered mild when the patient complained of m…	Not specified
Lorente J, Sabater F, Rivas MP, et al.	Ciprofloxacin plus fluocinolone acetonide versus ciprofloxacin alone in the treatment of diffuse otitis externa	2014	Acute dermo-epidermitis of the external auditory canal	Pruritis, otalgia, oedema, ear blockage, discharge from ear canal	Otalgia, otorrhoea, pruritus, side effects of treatments (not classified)
Mair E, Ansley J, Maxwell K, et al	OTO-201 for the treatment of otitis externa: Phase 2 clinical trial	2018	Not defined	Not specified	EAC erythema, EAC oedema, otalgia, side effects of treatment (not classified)
Marom T, Yelin R, Goldfarb A et al.	Comparison of safety and efficacy of foam-based versus solution-based ciprofloxacin for acute otitis externa	2010	AOE is a diffuse inflammation of the external auditory canal	On the basis of otoscopy findings. Additional criteria to aid diagnosis included pinna or tragal tenderness and an intact tympanic membrane	Otalgia, tragal tenderness, EAC oedema, EAC Otorrhoea
Masood A, Moumoulidis I, Ray S, et al.	A randomised controlled trial comparing Triadcortyl with 10% glycerine-ichthammol in the initial treatment of severe acute otitis externa	2007	Otitis externa is an inflammatory disorder of the external auditory canal, frequently associated with bacterial or fungal infection.	History of earache, itchiness, ear discharge and hearing loss. Examination findings of a narrowed, tender and erythemtous external auditory canal	Otalgia, EAC oedema, EAC erythema, tragal tenderness
McWilliams CJ, Smith CH, Goldman RD	Acute otitis externa in children	2012	Diffuse inflammation of the external acoustic meatus	Typical symptoms include otalgia, itching, and aural fullness. Signs include tenderness of the tragus and pinna, diffuse ear canal edema, conductive hearing loss, erythema, and otorrhea	Not specified
Mosges R, Domrose CM, Loffler J	Topical treatment of acute otitis externa: clinical comparison of an antibiotics ointment alone or in combination with hydrocortisone acetate	2007	Ear pain, transient hearing loss, otorrhea, and itching at some point.	Not specified	Otalgia, EAC erythema, EAC otorrhoea, EAC oedema
Mosges R, Kaatz V, Schmalz P et al.	Glycerol lidocaine eardrops for the treatment of acute abacterial otitis externa	2010	Not defined	Not specified	EAC erythema, EAC oedema, otorrhoea, otalgia
Mosges R, Nematian-Samani M, Hellmich M et al.	A meta-analysis of the efficacy of quinolone containing otics in comparison to antibiotic-steroid combination drugs in the local treatment of otitis externa	2011	The term otitis externa denotes the inflammation of the external auditory canal, in the broader sense also the pinna	Pain, redness, itching and secretion, the clinical picture can also include conductive hearing loss and even dizziness	Ear symptoms (not classified), Ear examination findings (not classified), swab culture
Mosges R, Schroder T, Baues C et al.	Dexamethasone phosphate in antibiotic ear drops for the treatment of acute bacterial otitis externa	2008	Ear pain, itching, otorrhea and stuffiness; hearing problems and vertigo are also often present	Diagnosis of acute unilateral bacterial otitis externa and a previous episode of otitis externa within the last 12 months	Otalgia, EAC erythema, EAC otorrhoea
Osguthorpe JD and Nielsen DR	Otitis externa: Review and clinical update	2006	Manifestations include pruritus, pain, and erythema, but as the disease progresses, other problems such as oedema, otorrhoea, and conductive hearing loss may develop. Disease can range from mild inflammation, which occurs in approximately 50% of cases, to life-threatening temporal bone infections in less than 0.5%	Not specified	Otalgia, EAC erythema, EAC otorrhoea, EAC oedema
Panahi Y, Akhavan A, Sahebkar A, et al.	Investigation of the effectiveness of Syzygium aromaticum, Lavandula angustifolia and Geranium robertianum essential oils in the treatment of acute external otitis: A comparative trial with ciprofloxacin	2014	Mild irritation with redness and slight oedema in the ear canal. However, at advanced stages, the symptoms would be oedema and increased secretions in the ear canal, and might be accompanied by palpable adenopathy localized around and behind the ears	Typical symptoms or signs such as pain, itching, oedema of the ear canal, tenderness, or irregular ear discharge.	Tragal tenderness, pruritus, otorrhoea, EAC erythema, EAC oedema, otalgia, swab culture
Patel M, Eisenberg L, Witsell D et al.	Assessment of acute otitis externa and otitis media with effusion performance measures in otolaryngology practices	2008	Acute otitis externa (AOE), or swimmer’s ear, is charac- terized by acute signs and symptoms at onset, in addition to inflammation of the external ear canal that may involve the pinna or tympanic membrane.	ICD9 codes 380.10/380.15/380.16/280.23	EAC oedema, otalgia, time off work, limitation of daily activities, lack of sleep
Rahman A, Rizwan S, Waycaster C et al.	Pooled analysis of two clinical trials comparing the clinical outcomes of topical ciprofloxacin/dexamethasone otic suspension and polymyxin B/neomycin/hydrocortisone otic suspension for the treatment of acute otitis externa in adults and children	2007	Infection and/or inflammation of the external ear canal	Otic inflammation, edema, pain, and discharge	Ear symptoms (not classified), Ear examination findings (not classified)
Rodrigues CDC, D'Avila JS, Nunes CP et al.	Comparison of two otologic suspensions of ciprofloxacin 2 mg/mL and hydrocortisone 10 mg/mL in the treatment of otitis externa: A multicenter, doubleblind, randomized study	2015	The clinical picture of otits externa includes intense, radiating pain to the temporal and mandibular regions, sensitivity to palpation and manipulation of the ear, loss of conductive audition and ear swelling by oedema, together with external ear canal stenosis due to accumulation of debris and secretions. Upon physical examination, the canal is erythematous and presents inflammatory infiltratio…	Not specified	Otalgia, otorrhoea, EAC oedema, side effects of treatment (not classified)
Roland PS and Wall M	Ciprofloxacin 0.3%/dexamethasone 0.1% topical drops for the management of otic infections	2008	Acute otitis externa (AOE) is an infection of the subdermal tissues of the external auditory canal.	Relatively rapid onset of localised ear pain, itching, and, if the condition is moderate to severe, the development of mild-to-moderate decrease in hearing. Physical examination generally demonstrates either significant oedema of the external auditory canal or erythema. Both may be present	Otalgia, tragal tenderness, swab culture
Roland PS, Younis R, and Wall GM	A comparison of ciprofloxacin/dexamethasone with neomycin/polymyxin/hydrocortisone for otitis externa pain	2007	Acute otitis externa (AOE), commonly known as “swimmer’s ear,” comprises dif- fuse cellulitis and bacterial infection of the skin and subdermis of the ear canalPain associated with AOE can range from a local dull ache to severe pain in the jaw or side of the head and it often prompts patients to seek evaluation and treatment.	Moderate OE (constant but tolerable pain); Severe OE (intense and unrelenting pain) <4 wk duration in 1 or both ears and intact tympanic membranes	EAC erythema, EAC oedema, otorrhoea, otalgia
Roland PS, Belcher BP, Bettis R et al.	A single topical agent is clinically equivalent to the combination of topical and oral antibiotic treatment for otitis externa	2008	Otitis externa (OE) is a common and painful infection of the outer ear canal	Rapid onset of localised ear pain, itching, and, if the condition is moderate to severe, the development of mild-to-moderate decrease in hearing. Physical examination generally demonstrates either significant oedema of the external auditory canal or erythema.	Otalgia
Rosenfeld RM, Brown L, Cannon CR et al.	Clinical practice guideline: Acute otitis externa	2006	Acute otitis externa is defined as diffuse inflammation of the external ear canal, which may also involve the pinna or tympanic membrane.	Rapid onset (generally within 48 hours) in the past 3 weeks, AND Symptoms of ear canal inflammation that include: ● Otalgia (often severe), itching, or fullness, ● WITH OR WITHOUT hearing loss or jaw pain,* AND Signs of ear canal inflammation that include: ● tenderness of the tragus, pinna, or both ● OR diffuse ear canal edema, erythema, or both ● WITH OR WITHOUT otorrhea, regional lymphadenitis,…	Not specified
Rosenfeld RM, Schwartz SR, Cannon CR et al.	Clinical practice guideline: acute otitis externa	2014	Based on observational studies and expert opinion 1. Rapid onset (generally within 48 hours) in the past 3 weeks, AND 2. Symptoms of ear canal inflammation that include: ● otalgia (often severe), itching, or fullness, ● WITH OR WITHOUT hearing loss or jaw pain,* AND 3. Signs of ear canal inflammation that include: ● tenderness of the tragus, pinna, or both ● OR diffuse ear canal edema, erythema, …	Not specified	Ear symptoms (not classified), ear examination findings (not classified), swab culture
Rosenfeld RM, Singer M, Wasserman JM et al.	Systematic review of topical antimicrobial therapy for acute otitis externa	2006	Diffuse inflammation of the external ear canal	Not specified	Ear symptoms (not classified), ear examination findings (not classified), swab culture
Schaefer P, and Baugh RF	Acute otitis externa: An update	2012	Diffuse inflammation of the external ear canal that may extend distally to the pinna and proximally to the tympanic membrane.	Not specified	Not specified
Shikiar R, Halpern MT, McGann M et al.	The Relation of Patient Satisfaction with Treatment of Otitis Externa to Clinical Outcomes: Development of an Instrument	1999	Not defined	Not specified	No of drops/administration, No of times/d drops used, side effects of burning or stinging post administration, side effects of itching, other side effects of medications, symptoms of plugged feeling, pruritus, otorrhoea, physician visit, emergency department or urgent care use, hospitalisation, other medications, hours/d of bed rest due to ear infection, hours/d of activity limitation, hours/d of…
Shrestha, B. Shrestha I, Amatya RC et al.	Effective treatment of acute otitis externa: a comparison of steroid antibiotic versus 10% ichthammol glycerine pack	2011	Otitis externa is a generalised condition of the skin of the external auditory canal that is characterized by general oedema and erythema.	Ten point Numerical Rating Scale (NRS) and score given by the patient. Divided the external auditory canal in four parts with 25% for each and scoring was performed as per the percentage of the involvement of canal by the same ENT surgeon.	Tragal tenderness, EAC oedema
Hall DO, Armstrong L, Demmery A el al	Quantification of Ga67 in Necrotising Otitis Externa	2010	Not defined	Clinical assessment and imaging (MRI, CT, nuclear medicine bone, Gallium scans)	Not specified						Not applicable	Not applicable	Not applicable
Vennewald I and Klemm E	Otomycosis: Diagnosis and treatment	2010	Not defined	Patient history, otoscopic examination and imaging studies	Not specified						No definition	No definition	No definition
Mosges R, Baues CM, Schroder T et al.	Acute bacterial otitis externa: Efficacy and safety of topical treatment with an antibiotic ear drop formulation in comparison to glycerol treatment	2011	Not defined	Diagnosis was confirmed by an ENT examination including a swab from the ear canal and a microscopic evaluation. An additional Weber test served to rule out involvement of the middle ear	Change of the five typical clinical symptoms: earache, itching, otorrhea, hearing impairment, and “clogged ear” at Visit 2 (Day 7) based on the initial examination on Day 0.						The primary outcome para- meter was the change of the five typical clinical symptoms, earache, itching, otor- rhea, hearing impairment, and “clogged ear” at Visit 2 (Day 7) based on the initial examination on Day 0.	assessment of effi- cacy and tolerability of the study medication as well as a survey of the investigator and patient on their satisfaction with the study medication were evaluated. In this connection, the oto- scopic findings of both visits (inclusion = Day 0 and comple- tion = Day 7) were the basis for the evaluation of efficacy. The investigator assessed the symptoms swelling, redness, desqua-…	day 7
Dorasala SP and Dorasala S	Medicated gelfoam for the treatment of recalcitrant otomycosis	2013	Not defined	Pain, blocked sensation,	Resolution of otomycosis						Resolution of otomycosis	No definition	6 days
Lee H, Kim J, Nguyen V	Ear infections: Otitis externa and otitis media	2013	Not defined	Not specified	Resolution of signs (e.g. erythema, oedema)						2. Resolution of signs (e.g. erythema, oedema), however determined.
de la Paz Cota BR, Cepero Vega PP, Matus Navarrete JJ et al.	Efficacy and safety of eberconazole 1% otic solution compared to clotrimazole 1% solution in patients with otomycosis	2018	Clinical evidence of pruritus, otalgia, otorrhea, and aural fullness	Diagnosis by clinical assessment	Negative fungal culture or presumed eradication and no signs and symptoms at 24 days from onset of symptoms						The proportion of subjects with complete response, defined as having a negative fungal culture or presumed eradication and a signs and symptoms score of 0 at the end of study (day 24). Partial response corresponded to negative culture or presumed eradication and a global score for signs and symptoms of 1 or 2, both on day 24. No response correlated with positive culture or ne- gative culture/pres…	The proportion of subjects with clinical cure (signs and symptoms score of 0) at each visit; the change in signs and symptoms score at the end of treatment (day 15) and at the end of study (day 24) both relative to baseline; and the proportion of subjects with negative fungal culture or presumed eradication on day 24.	At the end of the study (day 24)
Swain SK, Behera IC, Sahu MC et al	Povidone iodine soaked gelfoam for the treatment of recalcitrant otomycosis - Our experiences at a tertiary care teaching hospital of eastern India	2018	Not defined	Symptoms of itching of ear, earache, otorrhoea, blocked sensation in the ear and hearing loss . Ear examination findings of matted hyphae, spores or curdy precipitate in the ear canal	Clinically asymptomatic with normal appearance of ear canal. Ear canal free from erythema, debris and post treatment smear - no growth						clinically asymptomatic with normal appearance of ear canal. A favou- rable clinical outcome was obtained if the ear canal free from erythema, debris and post-treatment smear presented with normal flora without any growth	itching, otorrhoea, fullness, earache, hearing loss, canal wall erythema, tragal tenderness and congestion of tympanic membrane	2 weeks
Sylvester MJ, Sanghvi S, Patel VM et al.	Malignant otitis externa hospitalizations: Analysis of patient characteristics	2017	Not defined	ICD coded NOE (380.14)	Not specified
Hornigold R, Gillett D, Kiverniti E et al.	The management of otitis externa: a randomised controlled trial of a glycerol and icthammol ribbon gauze versus topical antibiotic and steroid drops	2008	Not defined	Otorrhoea, otalgia and hearing loss, signs of external auditory meatus infammation or exudate.	Pain score; oedema and presence of debris in the auditory canal						Pain score (VAS); oedema and presence of debris in the auditory canal ;	Patient satisfaction and return to work	5 days
Schwartz	Once-daily ofloxacin otic solution versus neomycin sulfate/polymyxin B sulfate/hydrocortisone otic suspension four times a day: a multicenter, randomized, evaluator-blinded trial to compare the efficacy, safety, and pain relief in pediatric patients with otitis externa	2006	Infection of the external auditory canal	Ear pain and erythematous or inflamed ear canal	Resolution of symptoms and signs						7-10 days
