# Supplementary material for: Acute otitis externa: Consensus definition, diagnostic criteria and core outcome set development
Source: PLOS journal article supplement (doi:10.1371/journal.pone.0251395), 2021-05-14
Supplement: S4 (10.1371/journal.pone.0251395.s004) [file journal.pone.0251395.s004]

| Candidate outcomes                                                                                     | Round 1 |              | Round 2 |              | Round 3 |              | Committee |
|--------------------------------------------------------------------------------------------------------|---------|--------------|---------|--------------|---------|--------------|-----------|
|                                                                                                        | Patient | Professional | Patient | Professional | Patient | Professional |           |
| The number/frequency of visits to ENT or the GP                                                        | +       | +            |         |              |         |              | +         |
| The need for pain relief                                                                               | +       | +            |         |              |         |              | +         |
| The need for antibiotics                                                                               | +       | +            |         |              |         |              | +         |
| Improvements in itchiness in the ear                                                                   | +       | +            |         |              |         |              | +         |
| Improvements in hearing impairment                                                                     | +       | +            |         |              |         |              | +         |
| Improvements in ear pain (otalgia)                                                                     | +       | +            |         |              |         |              | +         |
| Improvements in ear canal swelling (oedema)                                                            | +       | +            |         |              |         |              | +         |
| Improvements in ear canal redness (erythema)                                                           | +       | +            |         |              |         |              | +         |
| Improvements in discharge from the ear (otorrhoea)                                                     | +       | +            |         |              |         |              | +         |
| Spread of infection beyond the ear canal                                                               | +       | +            |         |              |         |              | +         |
| If patients were compliant with the treatment                                                          | +       | +            |         |              |         |              | +         |
| If patients completed the course of treatment                                                          | +       | +            |         |              |         |              | +         |
| The number of times the treatment is administered                                                      | +       | +            |         |              |         |              | +         |
| The need for overnight or in-hospital care                                                             | ?       | +            | +       |              |         |              | +         |
| The ease of applying the treatment                                                                     | ?       | ?            | +       | +            |         |              | +         |
| Results of bacterial or fungal growth on an ear swab                                                   | ?       | ?            | +       | +            |         |              | +         |
| Patient satisfaction with their access to appropriate care (for diagnosis & treatment)                 | +       | ?            |         | +            |         |              | +         |
| Patient satisfaction with the required frequency of the treatments                                     | +       | ?            |         | +            |         |              | +         |
| Patient satisfaction with the length of their symptoms                                                 | +       | ?            |         | +            |         |              | +         |
| Patient satisfaction with length of treatment, including number of visits to specialist services (ENT) | +       | ?            |         | +            |         |              | +         |
| Improvements in any pain on pressing just in front of the ear canal (tragal tenderness)                | +       | ?            |         | +            |         |              | +         |
| Widespread (systemic) side effects of treatments                                                       | ?       | +            | +       |              |         |              | +         |
| Time off work                                                                                          | +       | ?            |         | +            |         |              | +         |
| Local side effects of treatments                                                                       | ?       | +            | +       |              |         |              | +         |
| Impact on quality of life                                                                              | +       | ?            |         | +            |         |              | +         |
| Time to resolution of symptoms                                                                         |         |              | +       | +            |         |              | +         |
| Improvements in reactive over-healing in the ear canal (granulations)                                  | ?       | +            | ?       |              | +       | +            | +         |
| Widespread (systemic) side effects of pain relief                                                      | ?       | ?            | ?       | ?            | +       | +            | +         |
| Impact on the ability to work                                                                          | ?       | ?            | +       | ?            | +       | +            | +         |
| Impact on sleep                                                                                        | +       | ?            |         | ?            | +       | +            | +         |
| Patient satisfaction with the time required for outpatient appointments                                | +       | ?            |         | ?            | ?       | ?            | -         |
| Improvements in the feeling of anxiety                                                                 | ?       | ?            | ?       | ?            | ?       | ?            | -         |
| Improvements in jaw pain                                                                               | ?       | ?            | ?       | ?            | ?       | ?            | -         |
| Improvements in odour relating to the ear                                                              | ?       | ?            | +       | ?            | ?       | +            | -         |
| Improvements in a feeling of generalised weakness                                                      | ?       | ?            | ?       | ?            | ?       | ?            | -         |
| Improvements in a feeling of fullness in the ear (aural fullness)                                      | +       | ?            |         | ?            | ?       | ?            | -         |
| Improvement in the ability to concentrate                                                              | ?       | ?            | ?       | -            | ?       | -            | -         |
| Impact on the ability to socialise                                                                     | ?       | ?            | +       | ?            | ?       | ?            | -         |
| Impact on mental health                                                                                | ?       | ?            | ?       | ?            | ?       | ?            | -         |
| Impact on hours of bed rest                                                                            | ?       | ?            | ?       | ?            | ?       | ?            | -         |
| Impact on activities of daily living or performing household tasks                                     | +       | ?            |         | ?            | ?       | ?            | -         |
| Impact on ability to care for the family                                                               | ?       | ?            | ?       | ?            | ?       | ?            | -         |
| Death during treatment                                                                                 | ?       | ?            | ?       | ?            | +       | ?            | -         |
